# Supplementary material for: Vegetables for Healthy Diets in Low- and Middle-Income Countries: A Scoping Review of the Food Systems Literature
Source: PubMed Central journal article supplement — Food Nutr Bull. 2022 Jan 7;43(2):232–48. doi: 10.1177/03795721211068652 (PMC9118491; doi:10.1177/03795721211068652), 2022-01-07
Supplement: sj-pdf-2-fnb-10.1177_03795721211068652.pdf [file sj-pdf-2-fnb-10.1177_03795721211068652.pdf]

## Syntax for literature search

|                   |                                                                                                                                                                                                                                                                                                                                                                                                                                                                                                                                                                                                                                                                                                                                                                                                                                                                                                                                                                                                                                                                                                                                                                                                                                                                                                                                                                                                                                                                                                                                                                                                                                                                                                                                                                                                                                                                                                                                                                                                                                                                                                                                                                                                                                                                                                                                                                                                                                                                                                                                                                                                                                                                                                                                                                                                                                                                                                                                                                                                                                                                                                                                                                                              |
|-------------------|----------------------------------------------------------------------------------------------------------------------------------------------------------------------------------------------------------------------------------------------------------------------------------------------------------------------------------------------------------------------------------------------------------------------------------------------------------------------------------------------------------------------------------------------------------------------------------------------------------------------------------------------------------------------------------------------------------------------------------------------------------------------------------------------------------------------------------------------------------------------------------------------------------------------------------------------------------------------------------------------------------------------------------------------------------------------------------------------------------------------------------------------------------------------------------------------------------------------------------------------------------------------------------------------------------------------------------------------------------------------------------------------------------------------------------------------------------------------------------------------------------------------------------------------------------------------------------------------------------------------------------------------------------------------------------------------------------------------------------------------------------------------------------------------------------------------------------------------------------------------------------------------------------------------------------------------------------------------------------------------------------------------------------------------------------------------------------------------------------------------------------------------------------------------------------------------------------------------------------------------------------------------------------------------------------------------------------------------------------------------------------------------------------------------------------------------------------------------------------------------------------------------------------------------------------------------------------------------------------------------------------------------------------------------------------------------------------------------------------------------------------------------------------------------------------------------------------------------------------------------------------------------------------------------------------------------------------------------------------------------------------------------------------------------------------------------------------------------------------------------------------------------------------------------------------------------|
| Diets & Nutrition | diet* OR intake OR consumption OR serving* OR portion* OR utili*ation OR eating OR "food choice*" OR "food variety" OR "food diversity" OR "food quality" OR "nutrition* security" OR "food security" OR "public health" OR "global health" OR "food system*"                                                                                                                                                                                                                                                                                                                                                                                                                                                                                                                                                                                                                                                                                                                                                                                                                                                                                                                                                                                                                                                                                                                                                                                                                                                                                                                                                                                                                                                                                                                                                                                                                                                                                                                                                                                                                                                                                                                                                                                                                                                                                                                                                                                                                                                                                                                                                                                                                                                                                                                                                                                                                                                                                                                                                                                                                                                                                                                                |
| Vegetables        | vegetable* OR horticultur* OR "orphan crop*" OR "neglected species" OR "undertuili*ed species" OR "edible plant*" OR "indigenous crop*"                                                                                                                                                                                                                                                                                                                                                                                                                                                                                                                                                                                                                                                                                                                                                                                                                                                                                                                                                                                                                                                                                                                                                                                                                                                                                                                                                                                                                                                                                                                                                                                                                                                                                                                                                                                                                                                                                                                                                                                                                                                                                                                                                                                                                                                                                                                                                                                                                                                                                                                                                                                                                                                                                                                                                                                                                                                                                                                                                                                                                                                      |
| LMIC              | Afghanistan OR Afghan OR Albania* OR Algeria* OR "American Samoa*" OR Angola* OR Armenia* OR Azerbaijan* OR Bangladesh* OR Belarus OR Belorussian OR Beliz* OR Benin* OR Bhutan* OR Bolivia* OR "Bosnia and Herzegovina" OR Botswan* OR Brazil* OR Bulgaria* OR "Burkina Faso" OR Burkinabe OR Burund* OR "Cabo Verde" OR Cambodia* OR Cameroon* OR "Cape Verde" OR "Cape Verdean" OR "Central African Republic" OR Chad* OR China OR Chinese OR Colombia* OR Comoros OR Comorian OR "Democratic Republic of Congo" OR "Republic of Congo" OR Congo OR Congolese OR "Costa Rica" OR "Costa Rican" OR "Côte d'Ivoire" OR "Republic of Côte d'Ivoire" OR "Ivory Coast" OR Ivorian OR Djibouti* OR Dominica* OR "Dominican Republic" OR Ecuador* OR Egypt* OR "Arab Republic of Egypt" OR "El Salvador" OR Salvadorian OR "Equatorial Guinea" OR Guinean OR Eritrea* OR Ethiopia* OR Fiji* OR Gabon* OR Gambia* OR Georgia* OR Ghana* OR Grenad* OR Guatemala* OR Guinea OR "Guinea-Bissau" OR Guyan* OR Haiti* OR Hondura* OR India* OR Indonesia* OR Iran* OR "Islamic Republic of Iran" OR Iraq* OR Jamaica* OR Jordan* OR Kazakh* OR Kenya OR Kenyan OR Kiribati OR Korea* OR Kosov* OR "Democratic Republic of Korea" OR "Kyrgyz Republic" OR Kyrgyzstan* OR Lao OR Laos OR Laotians OR Lebanon OR Lebanese OR Lesotho OR Liberia* OR Libya* OR Macedonia* OR "republic of Macedonia" OR Madagasca* OR Malawi* OR Malaysia* OR Maldives OR Maldivian OR Mali OR Malian OR "Marshall Islands" OR Mauritania* OR Mauritius OR Mauritian OR Mexic* OR Micronesia* OR "federal states of Micronesia" OR Moldov* OR Mongolia* OR Montenegr* OR Morocc* OR Mozambique OR Mozambican OR Myanmar OR Namibia* OR Nauru* OR Nepal* OR Nicaragua* OR Niger* OR Nigeria* OR Pakistan* OR "Papua New Guinea" OR Paraguay* OR Peru* OR Philippine* OR Romania* OR "Russian Federation" OR Rwanda* OR Samoa* OR "Sao Tome and Principe" OR Sao Tomean OR Senegal* OR Serbia* OR "Sierra Leone" OR "Sierra Leonian" OR "Solomon Islands" OR Somali* OR "South Africa" OR "South African" OR "South Sudan*" OR "Sri Lanka" OR "Sri Lankan" OR "Saint Lucia" OR "Saint Vincent and the Grenadines" OR Sudan* OR Suriname* OR Swaziland Or Swazi OR "Syrian Arab Republic" Or Syria* OR Tajikistan OR Tajik OR Tanzania* OR Thailand OR Thai OR "Timor-Leste" OR Togo* OR Tonga* OR Tunisia* OR Turkey OR Turkish OR Turkmenistan OR Tuvalu OR Uganda* OR Ukrain* OR Uzbekistan OR Uzbek OR Vanuat* OR Venezuela* OR Vietnam* OR "West Bank and Gaza" OR Yemen* OR "Republic of Yemen" OR Zambia* OR Zimbabwe* OR "developing country" OR "developing countries" OR "developing nation" OR "developing nations" OR "developing population" OR "developing populations" OR "developing world" OR "less developed country" OR "less developed countries" OR "less developed nation" OR "less developed nations" OR "less developed population" OR "less developed populations" OR "less developed world" OR "lesser developed country" OR "lesser developed countries" OR "lesser developed nation" OR "lesser developed nations" OR "lesser developed population" OR "lesser developed populations" OR "lesser |

developed world" OR "under developed country" OR "under developed countries"  
OR "under developed nation" OR "under developed nations" OR "under developed  
population" OR "under developed populations" OR "under developed world" OR  
"underdeveloped country" OR "underdeveloped countries" OR "underdeveloped  
nation" OR "underdeveloped nations" OR "underdeveloped population" OR  
"underdeveloped populations" OR "underdeveloped world" OR "middle income  
country" OR "middle income countries" OR "middle income nation" OR "middle  
income nations" OR "middle income population" OR "middle income populations" OR  
"low income country" OR "low income countries" OR "low income nation" OR "low  
income nations" OR "low income population" OR "low income populations" OR  
"lower income country" OR "lower income countries" OR "lower income nation" OR  
"lower income nations" OR "lower income population" OR "lower income  
populations" OR "underserved country" OR "underserved countries" OR  
"underserved nation" OR "underserved nations" OR "underserved population" OR  
"underserved populations" OR "underserved world" OR "under served country" OR  
"under served countries" OR "under served nation" OR "under served nations" OR  
"under served population" OR "under served populations" OR "under served world"  
OR "deprived country" OR "deprived countries" OR "deprived nation" OR "deprived  
nations" OR "deprived population" OR "deprived populations" OR "deprived world"  
OR "poor country" OR "poor countries" OR "poor nation" OR "poor nations" OR "poor  
population" OR "poor populations" OR "poor world" OR "poorer country" OR "poorer  
countries" OR "poorer nation" OR "poorer nations" OR "poorer population" OR  
"poorer populations" OR "poorer world" OR "developing economy" OR "developing  
economies" OR "less developed economy" OR "less developed economies" OR "lesser  
developed economy" OR "lesser developed economies" OR "under developed  
economy" OR "under developed economies" OR "underdeveloped economy" OR  
"underdeveloped economies" OR "middle income economy" OR "middle income  
economies" OR "low income economy" OR "low income economies" OR "lower  
income economy" OR "lower income economies" OR "low gdp" OR "low gnp" OR  
"low gross domestic" OR "low gross national" OR "lower gdp" OR "lower gnp" OR  
"lower gross domestic" OR "lower gross national" OR "lami" OR "lami countries" OR "third world"  
OR "lami country" OR "lami countries" OR "transitional country" OR "transitional  
countries" OR "pacific island states" OR "pacific islands" OR "south pacific"
